# Supplementary material for: Effect of Nail Grips on Weight Bearing and Limb Function in 30 Dogs 2 Weeks Post Tibial Plateau Leveling Osteotomy
Source: MDPI journal article supplement (doi:10.3390/ani12182312), 2022-09-06
Supplement: s1 [file s1]

**Supplementary Table S1: Client Specific Outcome Measures survey completed on days 1, 7, and 14.**

**Please rate the following: (Compare to before patient's injury)**

1. Walking across slippery floor using the surgical leg

0= no problem

1=mildly problematic

2=moderately problematic

3=severely problematic

4= impossible

2. Getting up from resting position using the surgical leg

0= no problem

1=mildly problematic

2=moderately problematic

3=severely problematic

4= impossible

3. Consistently using surgical leg during a 5-minute walk using the surgical leg

0= no problem

1=mildly problematic

2=moderately problematic

3=severely problematic

4= impossible
